# Supplementary material for: Association between Iron Intake and Diabetic Peripheral Neuropathy in Type 2 Diabetes: Significance of Iron Intake and the Ratio between Iron Intake and Polyunsaturated Fatty Acids Intake
Source: PubMed Central journal article supplement (PMC7693683; doi:10.3390/nu12113365), 2020-11-01
Supplement: nutrients-12-03365-s001.pdf [file nutrients-12-03365-s001.pdf]

**Table S1.** Clinical and biochemical data of individuals according to the presence of DPN.

| Characteristic                                      | Study not enroll<br>( <i>n</i> = 53) |   |      | Study enroll<br>( <i>n</i> = 147) |   |      | <i>p</i> value |
|-----------------------------------------------------|--------------------------------------|---|------|-----------------------------------|---|------|----------------|
| Male, <i>n</i> (%)                                  | 36 (67.9)                            |   |      | 86 (58.5)                         |   |      | 0.228          |
| Age (years)                                         | 55.7                                 | ± | 10.0 | 58.7                              | ± | 9.5  | 0.052          |
| Height (cm)                                         | 165.1                                | ± | 9.8  | 163.4                             | ± | 8.6  | 0.227          |
| Body weight (kg)                                    | 69.9                                 | ± | 14.9 | 67.3                              | ± | 11.0 | 0.188          |
| BMI (kg/m <sup>2</sup> )                            | 25.5                                 | ± | 4.2  | 25.2                              | ± | 3.1  | 0.596          |
| Systolic BP (mmHg)                                  | 128                                  | ± | 19   | 130                               | ± | 14   | 0.368          |
| Diastolic BP (mmHg)                                 | 76                                   | ± | 10   | 75                                | ± | 9    | 0.635          |
| Diabetes duration (years)                           | 10.4                                 | ± | 8.7  | 9.8                               | ± | 7.1  | 0.676          |
| FPG (mmol/L)                                        | 8.1                                  | ± | 2.5  | 7.7                               | ± | 2.0  | 0.154          |
| HbA1c (mmol/mol)                                    | 59.7                                 | ± | 17.5 | 56.1                              | ± | 14.0 | 0.184          |
| HbA1c (%)                                           | 7.6                                  | ± | 1.6  | 7.3                               | ± | 1.3  | 0.190          |
| Total cholesterol (mmol/L)                          | 4.2                                  | ± | 1.2  | 4.1                               | ± | 0.9  | 0.571          |
| Triglyceride (mmol/L) <sup>a</sup>                  | 1.5                                  | ± | 0.0  | 1.4                               | ± | 1.0  | 0.237          |
| HDL cholesterol (mmol/L)                            | 1.2                                  | ± | 0.3  | 1.2                               | ± | 0.3  | 0.476          |
| LDL cholesterol (mmol/L)                            | 2.4                                  | ± | 0.8  | 2.4                               | ± | 0.7  | 0.902          |
| Urea nitrogen (mmol/L)                              | 5.9                                  | ± | 1.2  | 5.7                               | ± | 1.9  | 0.428          |
| Creatinine (μmol/L)                                 | 70.7                                 | ± | 17.7 | 70.7                              | ± | 17.7 | 0.282          |
| eGFR (mL min <sup>-1</sup> (1.73 m) <sup>-2</sup> ) | 100.0                                | ± | 22.9 | 94.1                              | ± | 21.9 | 0.095          |
| AST (U/L)                                           | 31.0                                 | ± | 16.0 | 28.3                              | ± | 12.3 | 0.220          |
| ALT (U/L)                                           | 30.8                                 | ± | 20.8 | 28.0                              | ± | 15.1 | 0.372          |
| Insulin (pmol/L)                                    | 57.6                                 | ± | 24.3 | 59.0                              | ± | 31.3 | 0.793          |
| HOMA-IR                                             | 3.0                                  | ± | 1.8  | 2.9                               | ± | 1.6  | 0.576          |
| HOMA-B <sup>a</sup>                                 | 37.6                                 | ± | 1.8  | 39.2                              | ± | 2.1  | 0.737          |
| MNSI-Q (score)                                      | 2.2                                  | ± | 1.8  | 2.3                               | ± | 2.1  | 0.918          |
| MNSI-PE (score)                                     | 2.6                                  | ± | 1.3  | 2.3                               | ± | 1.3  | 0.099          |
| Smoking status, <i>n</i> (%)                        |                                      |   |      |                                   |   |      | 0.759          |
| Never smoker                                        | 28 (52.8)                            |   |      | 69 (46.9)                         |   |      |                |
| Ex-smoker                                           | 16 (30.2)                            |   |      | 49 (33.3)                         |   |      |                |
| Current smoker                                      | 9 (17.0)                             |   |      | 29 (19.7)                         |   |      |                |
| Alcohol, <i>n</i> (%)                               | 27 (50.9)                            |   |      | 77 (52.4)                         |   |      | 0.223          |

Data are expressed as mean ± SD or geometric mean ± geometric SD or number (%). <sup>a</sup> Variable was natural log-transformed before statistical analysis and expressed as geometric mean ± geometric SD. DPN, diabetic peripheral neuropathy; BMI, body mass index; BP, blood pressure; HbA<sub>1c</sub>, glycated hemoglobin; HDL, high-density lipoprotein; LDL, low-density lipoprotein; eGFR, estimated glomerular filtration rate; AST, aspartate aminotransferase; ALT, alanine aminotransferase; HOMA-IR, homeostatic model assessment for insulin resistance; HOMA-B, homeostatic model assessment for

beta cell function; FPG, fasting plasma glucose; MNSI-Q, Michigan Neuropathy Screening Instrument-questionnaire; MNSI-PE, Michigan Neuropathy Screening Instrument-physical examination.

**Table S2.** Use of lipid-lowering drugs in individuals according to the presence of DPN.

| Variable                  | DPN (-) ( <i>n</i> = 79) | DPN (+) ( <i>n</i> = 68) | <i>p</i> value |
|---------------------------|--------------------------|--------------------------|----------------|
| Statin, <i>n</i> (%)      |                          |                          | 0.526          |
| No statin                 | 27 (34.2)                | 16 (23.5)                |                |
| Low-intensity statin      | 5 (6.3)                  | 4 (5.9)                  |                |
| Moderate-intensity statin | 39 (49.4)                | 41 (60.3)                |                |
| High-intensity statin     | 8 (10.1)                 | 7 (10.3)                 |                |
| Ezetimibe, <i>n</i> (%)   | 4 (5.1)                  | 8 (11.8)                 | 0.226          |
| Fenofibrate, <i>n</i> (%) | 1 (1.3)                  | 3 (4.4)                  | 0.336          |

Data are expressed as number (%). DPN, diabetic peripheral neuropathy.

**Table S3.** Use of antidiabetic drugs in individuals according to the presence of DPN.

| Variable                                      | DPN (-) ( <i>n</i> = 79) | DPN (+) ( <i>n</i> = 68) | <i>p</i> value |
|-----------------------------------------------|--------------------------|--------------------------|----------------|
| Metformin, <i>n</i> (%)                       | 71 (89.9)                | 59 (86.8)                | 0.557          |
| Sulfonylurea, <i>n</i> (%)                    | 19 (24.1)                | 21 (30.9)                | 0.353          |
| DPP-4 inhibitor, <i>n</i> (%)                 | 44 (55.7)                | 35 (51.5)                | 0.608          |
| SGLT-2 inhibitor, <i>n</i> (%)                | 10 (12.7)                | 9 (13.2)                 | 0.917          |
| Thiazolidinedione, <i>n</i> (%)               | 6 (7.6)                  | 5 (7.4)                  | 0.956          |
| $\alpha$ -glucosidase inhibitor, <i>n</i> (%) | 1 (1.4)                  | 1 (2.0)                  | 0.797          |
| GLP-1 agonist, <i>n</i> (%)                   | 2 (2.5)                  | 1 (1.5)                  | 0.650          |
| Insulin, <i>n</i> (%)                         | 11 (13.9)                | 14 (20.6)                | 0.284          |

Data are expressed as number (%). DPN, diabetic peripheral neuropathy; DPP, dipeptidyl peptidase; SGLT, sodium-glucose cotransporter; GLP, glucagon-like peptide.
